# Supplementary material for: Synthesis and Spectroscopic Evaluation of Two Novel Glycosylated Zinc(II)-Phthalocyanines
Source: PubMed Central journal article supplement (PMC6332196; doi:10.3390/molecules201018367), 2015-10-09
Supplement: molecules-20-18367-s001.pdf [file molecules-20-18367-s001.pdf]

# Supporting Information

## NMR-Spectroscopy:

### Compound 3

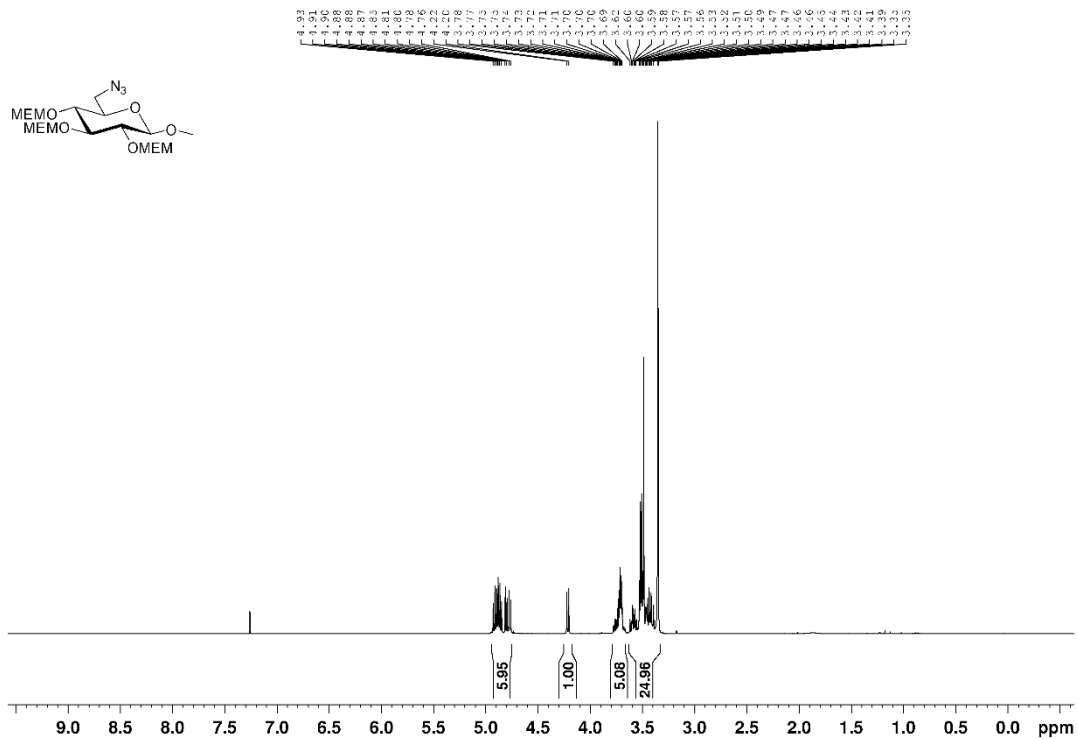

Figure S1. <sup>1</sup>H-NMR of compound 3.

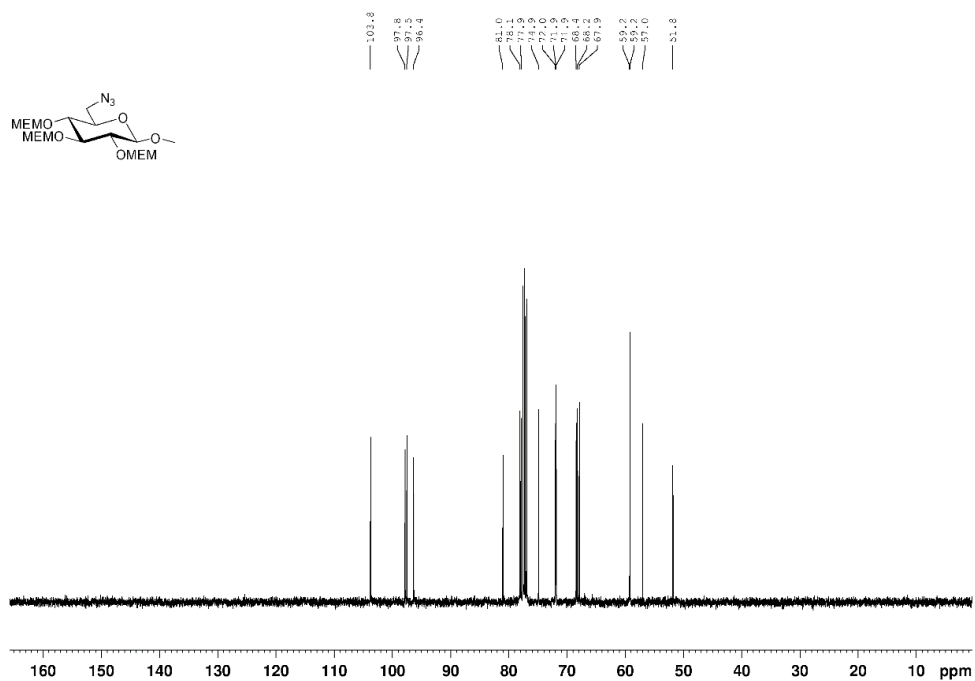

Figure S2. <sup>13</sup>C-NMR of compound 3.

Compound **5a**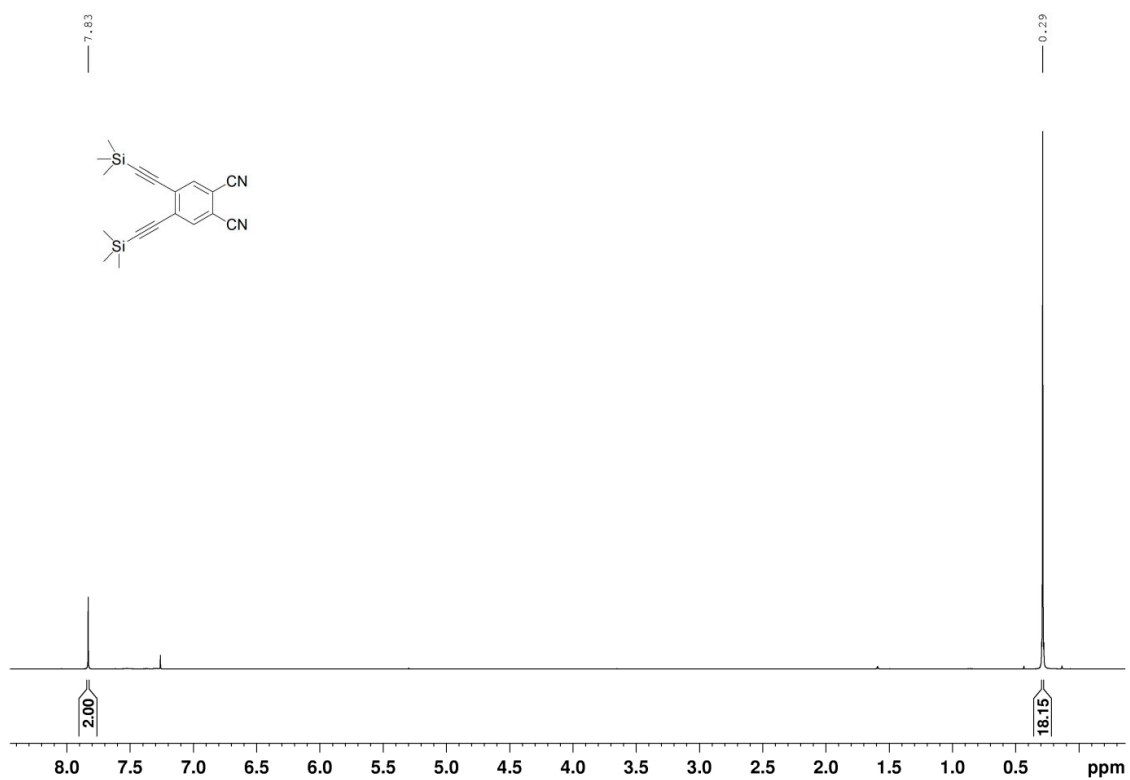Figure S3. <sup>1</sup>H-NMR of compound **5a**.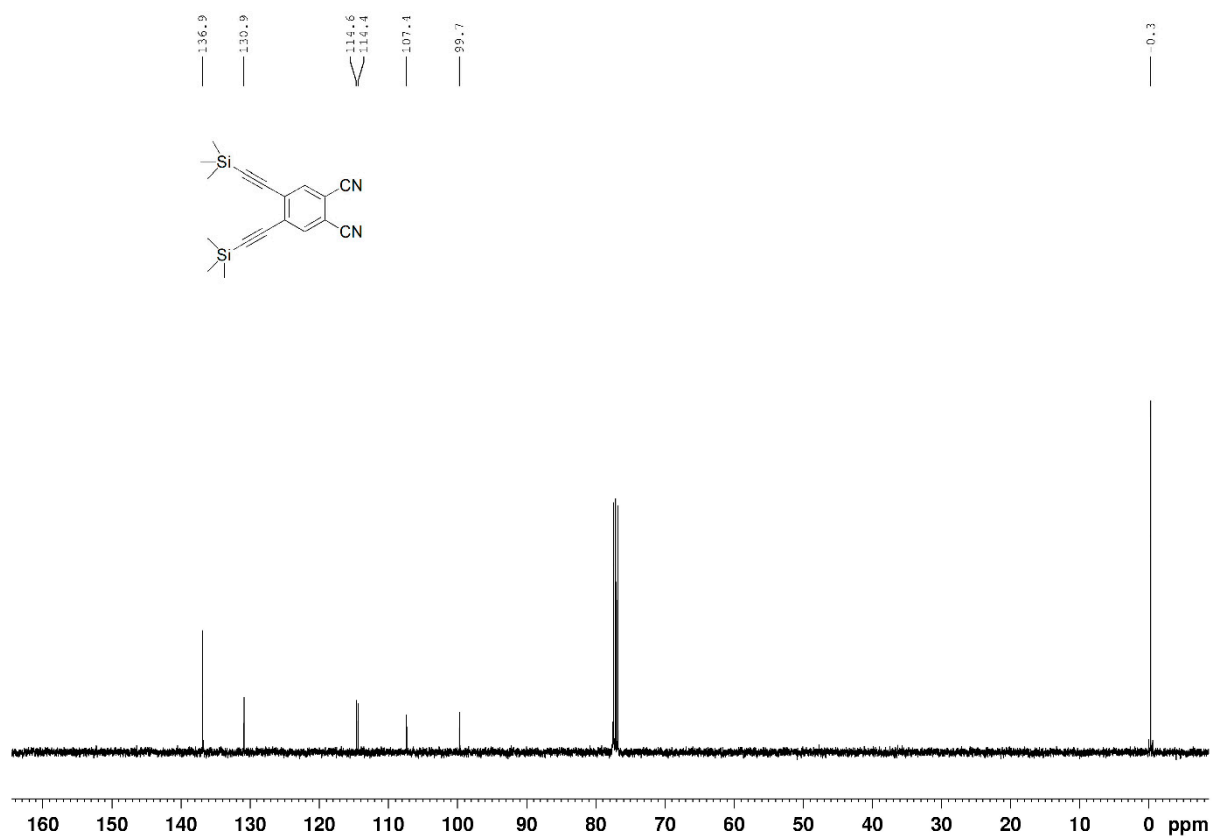Figure S4. <sup>13</sup>C-NMR of compound **5a**.

Compound **5b**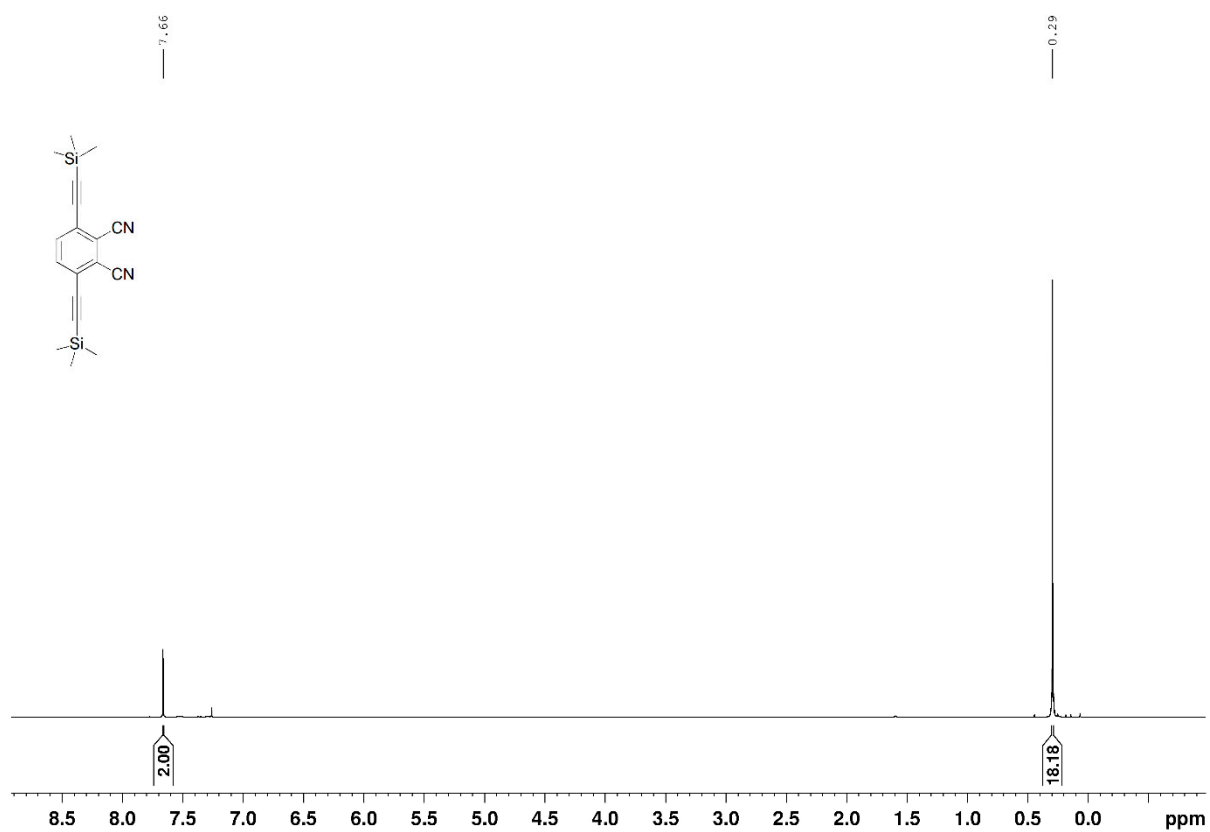Figure S5. <sup>1</sup>H-NMR of compound **5b**.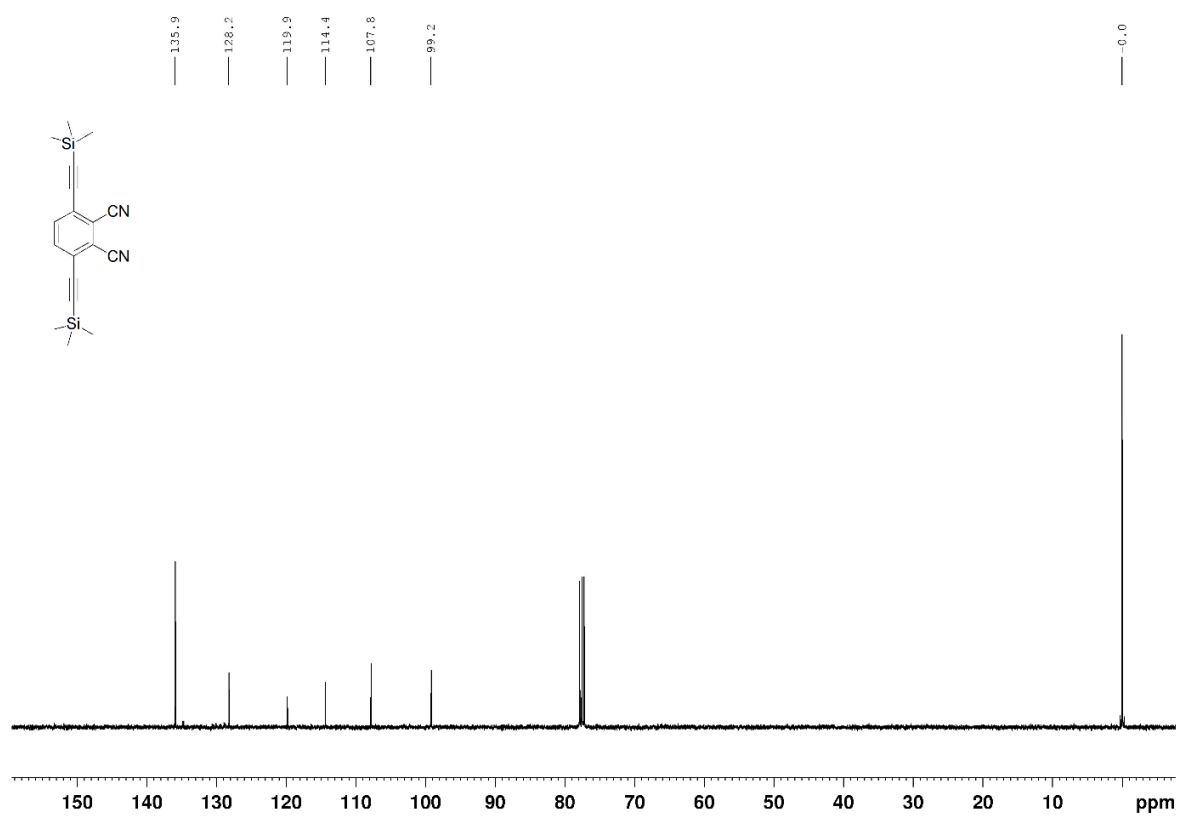Figure S6. <sup>13</sup>C-NMR of compound **5b**.

Compound **6b**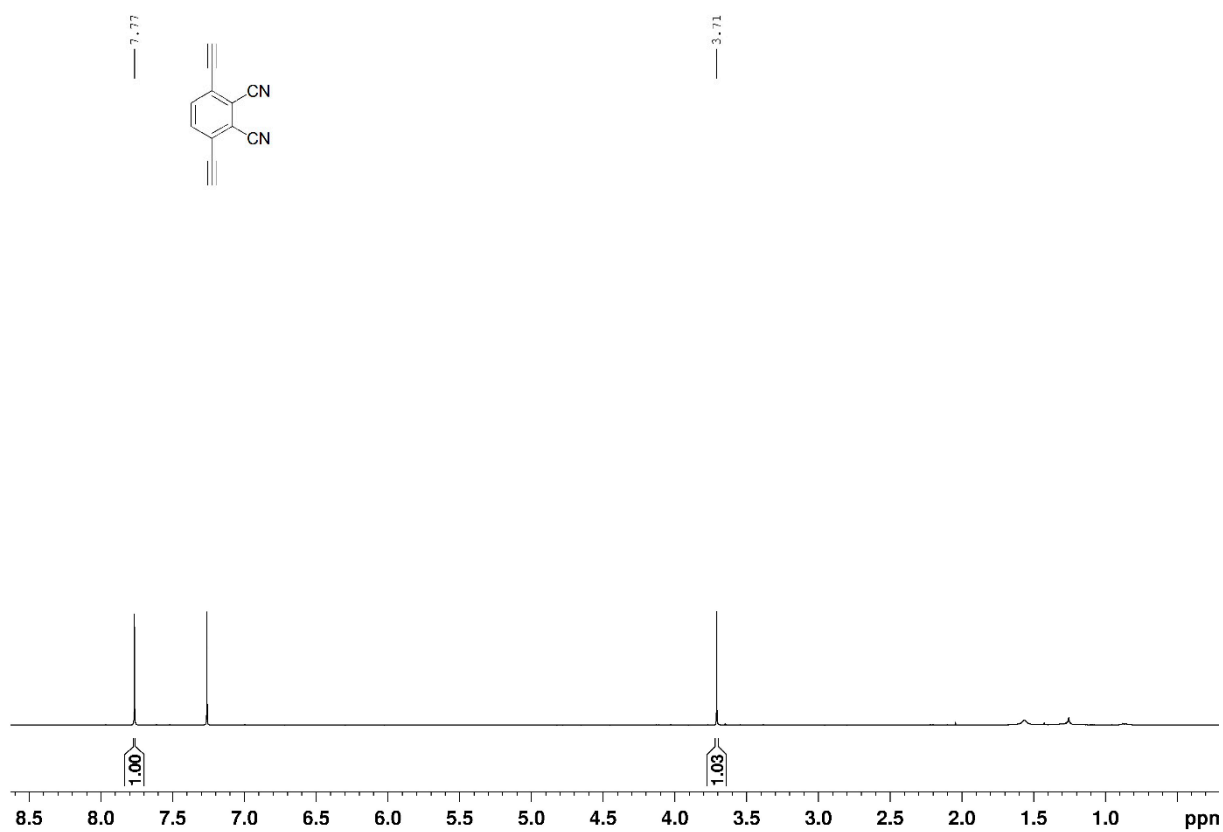Figure S7. <sup>1</sup>H-NMR of compound **6b**.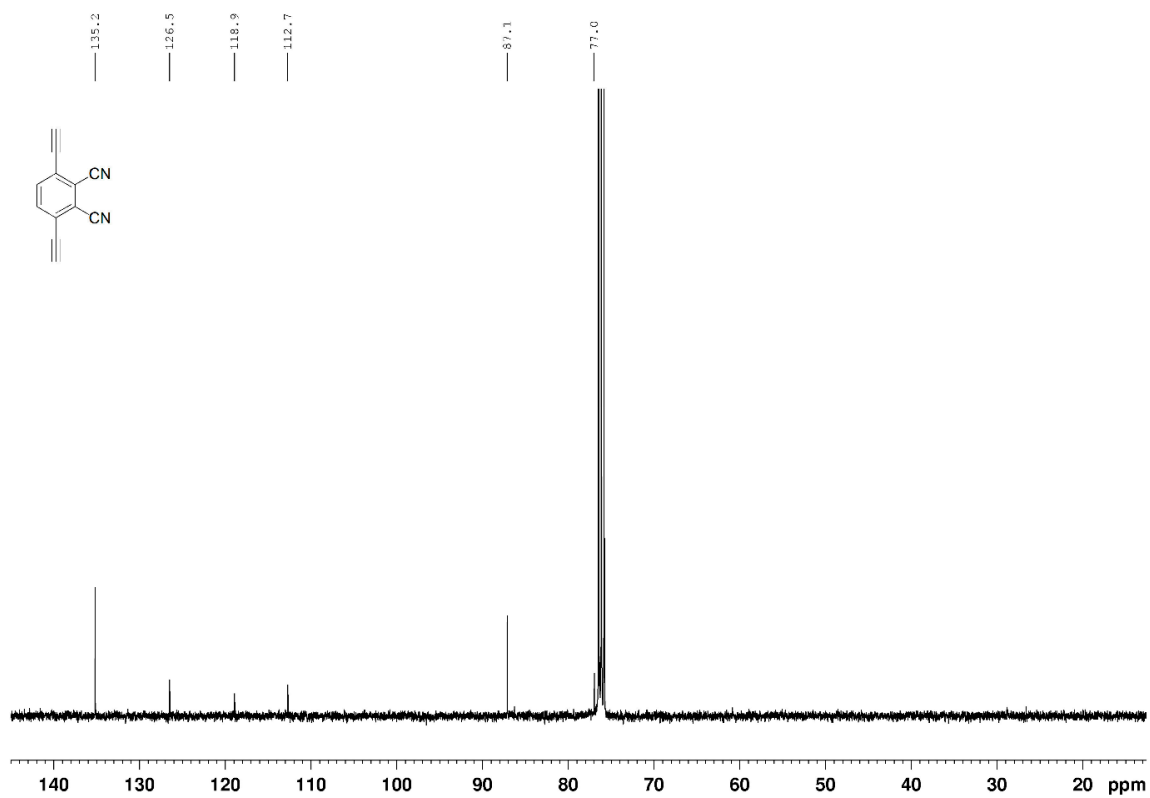Figure S8. <sup>13</sup>C-NMR of compound **6b**.

## Compound 7a

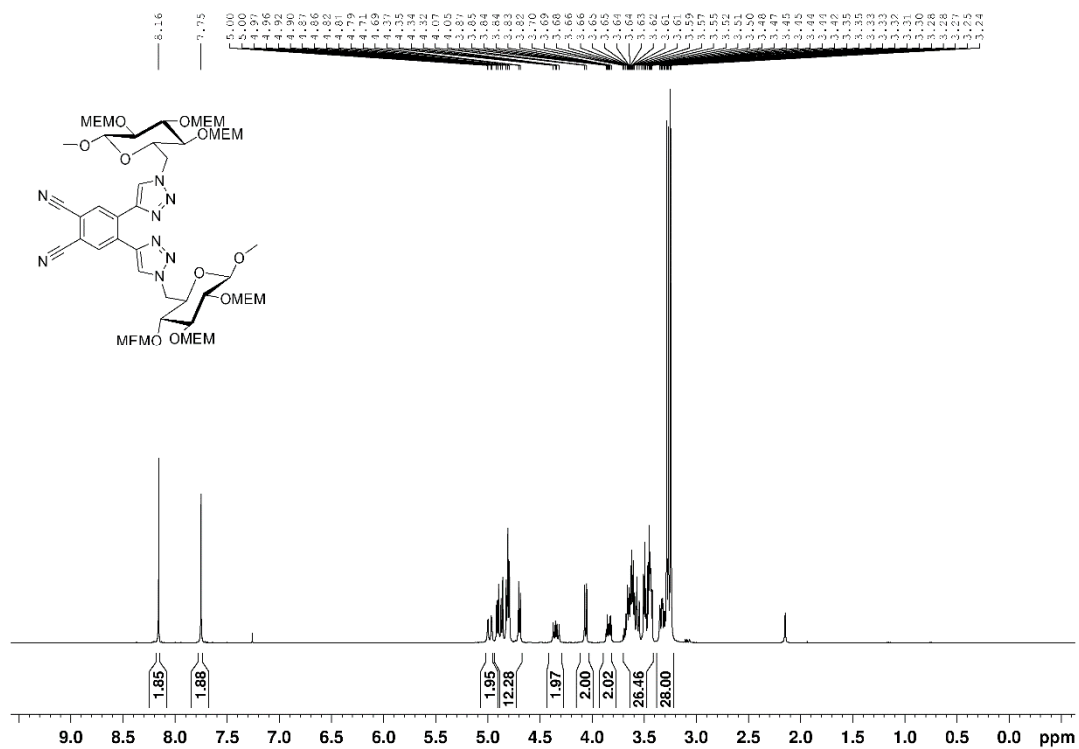Figure S9.  $^1\text{H-NMR}$  of compound 7a.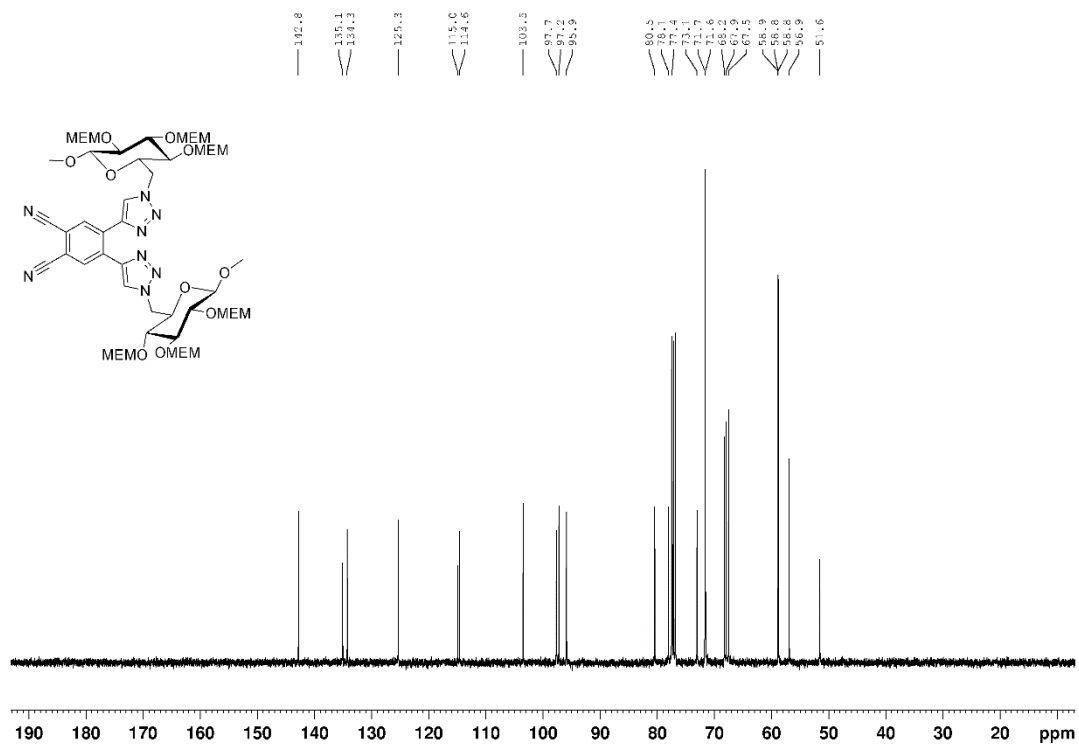Figure S10.  $^{13}\text{C-NMR}$  of compound 7a.

## Compound 7b

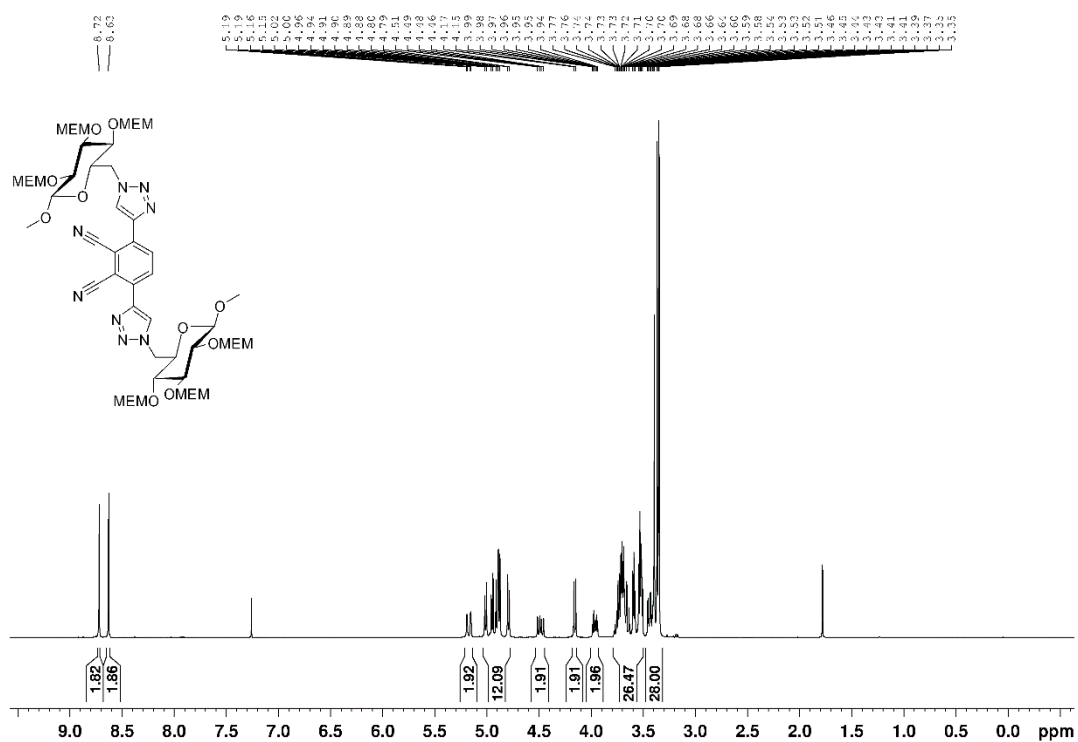Figure S11. <sup>1</sup>H-NMR of compound 7b.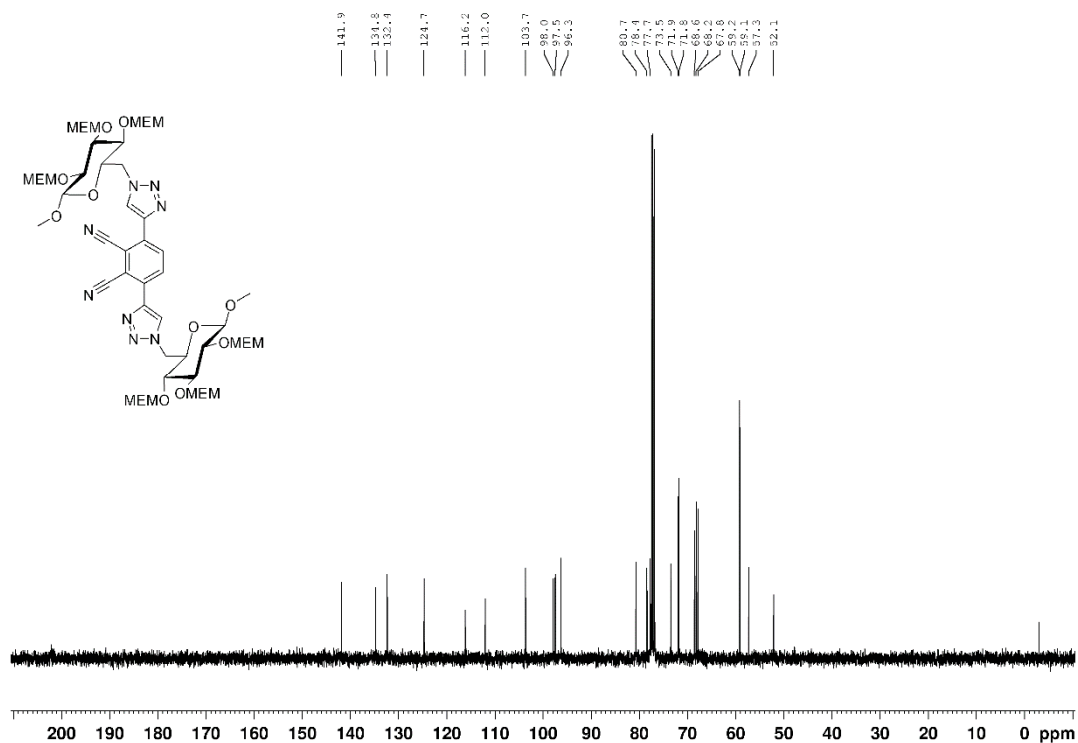Figure S12. <sup>13</sup>C-NMR of compound 7b.







Compound **9a**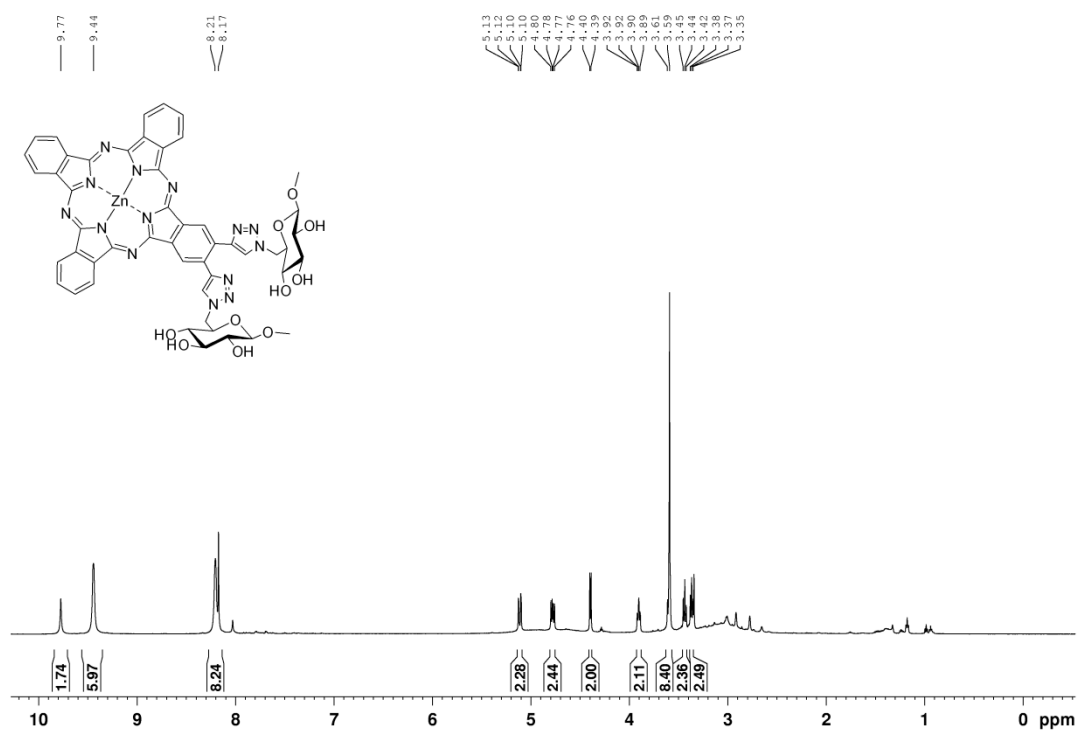Figure S17. <sup>1</sup>H-NMR of compound **9a**.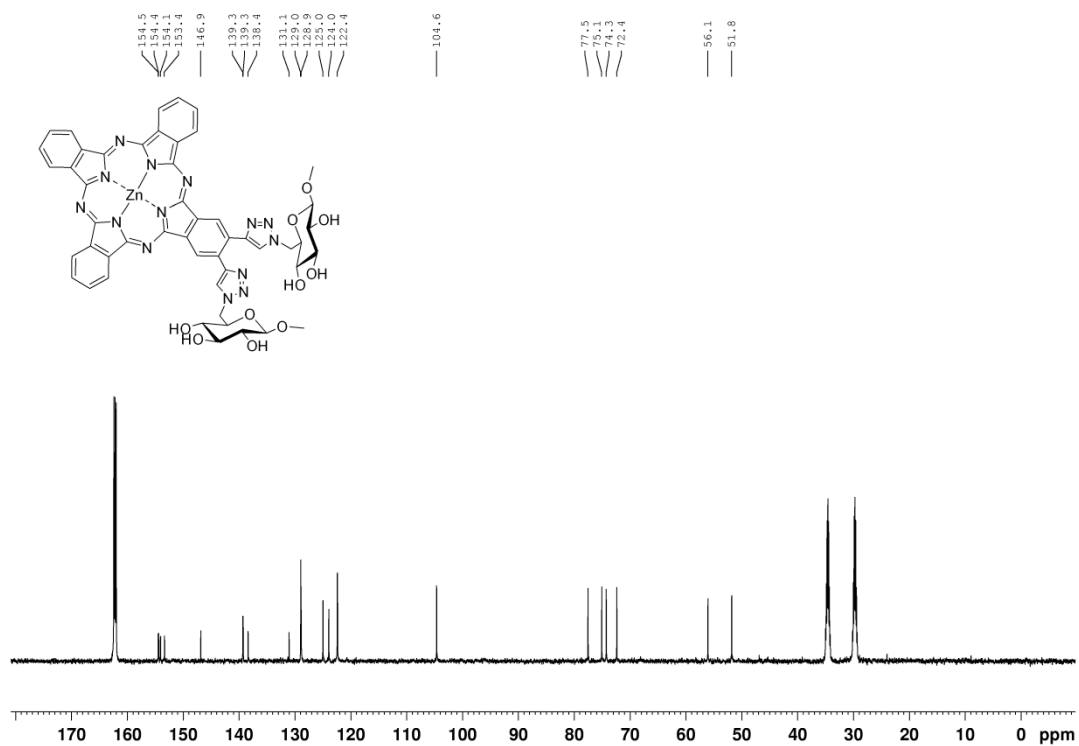Figure S18. <sup>13</sup>C-NMR of compound **9a**.

Compound **9b**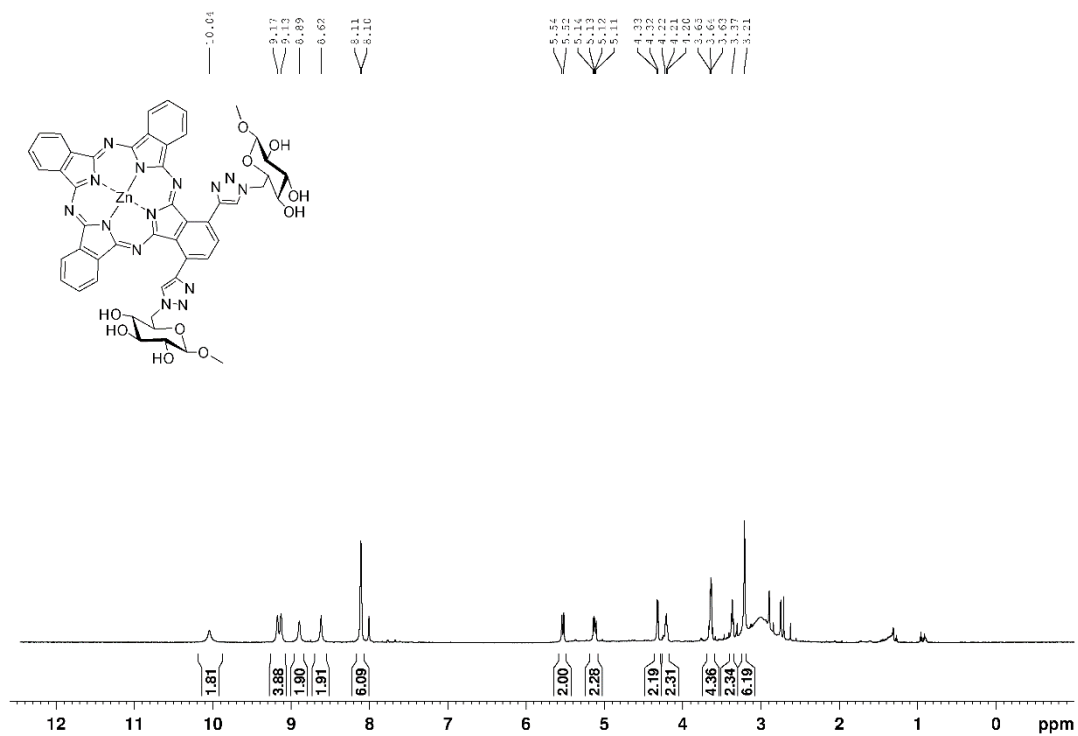Figure S19.  $^1\text{H}$ -NMR of compound **9b**.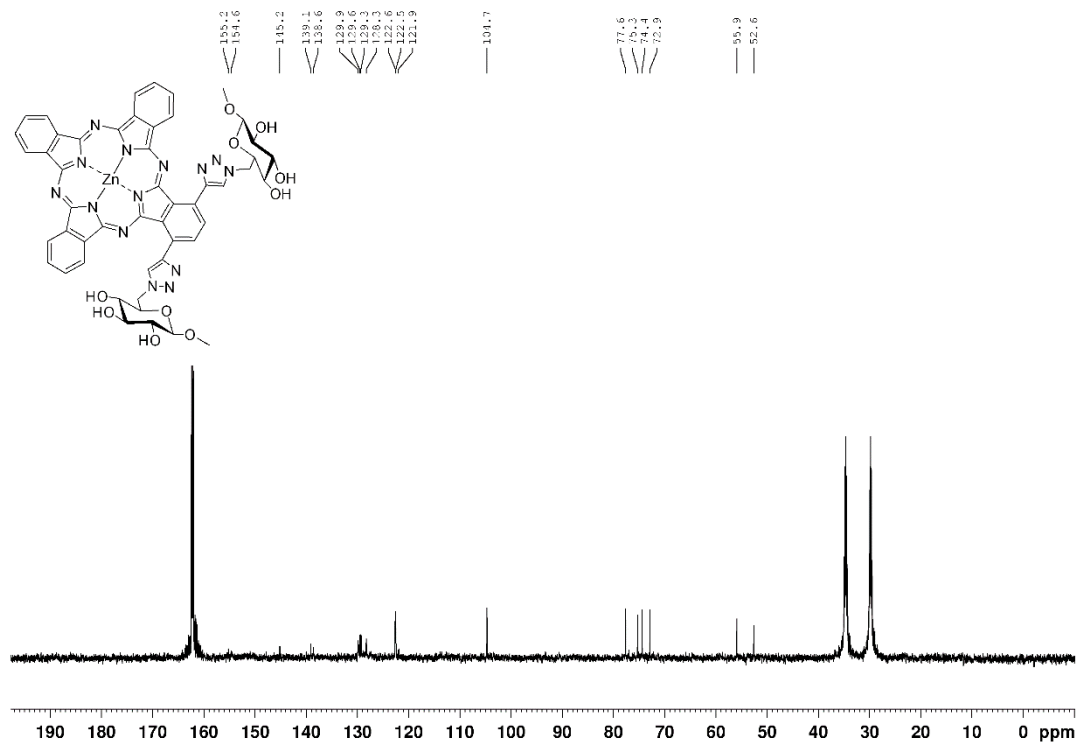Figure S20.  $^{13}\text{C}$ -NMR of compound **9b**.

## MALDI-TOF spectra:

Compound **8a**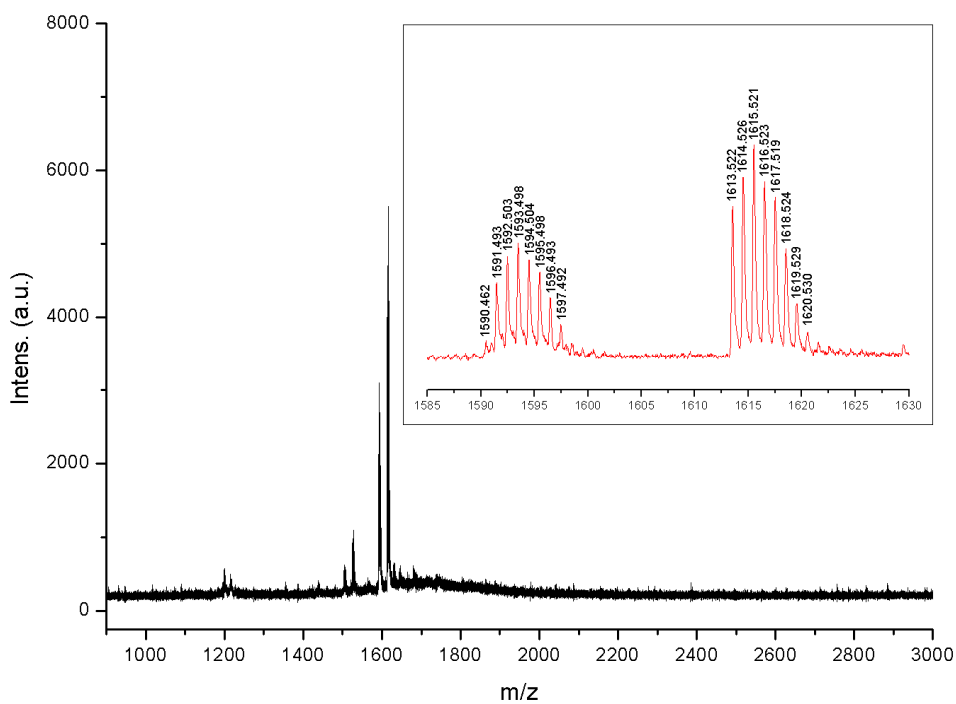Figure S21. MALDI-TOF spectrum of **8a**.Compound **8b**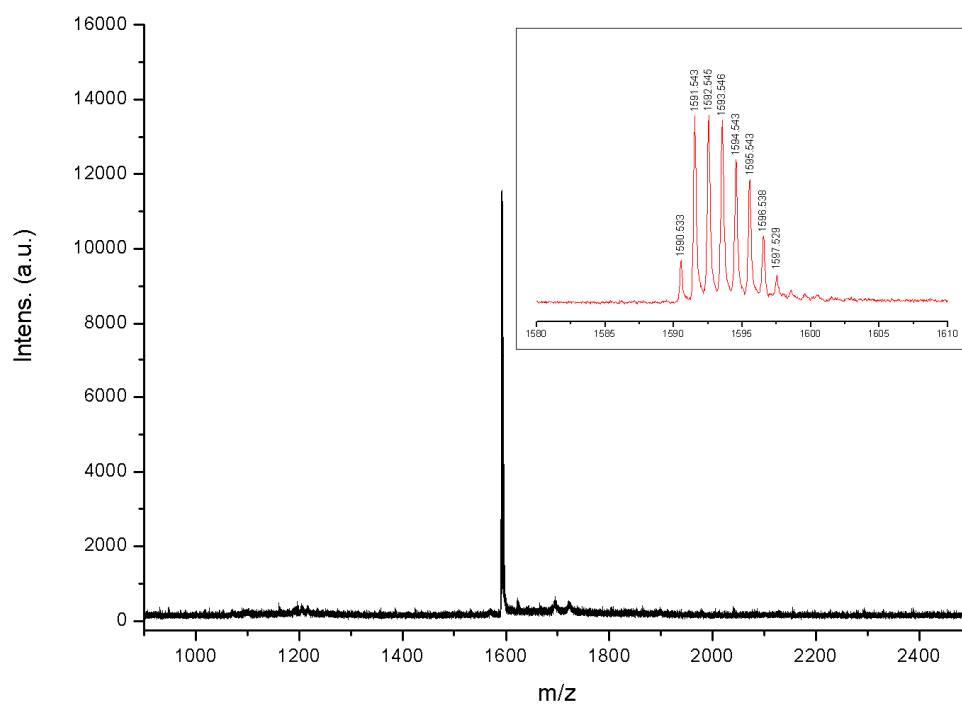Figure S22. MALDI-TOF spectrum of **8b**.

Compound **9a**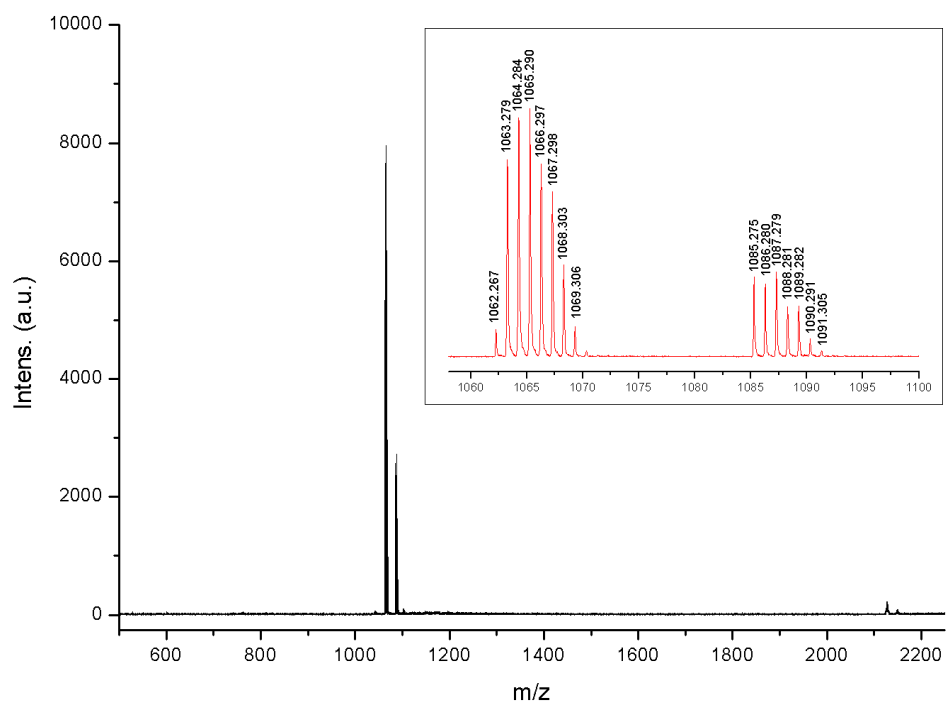Figure S23. MALDI-TOF spectrum of **9a**.Compound **9b**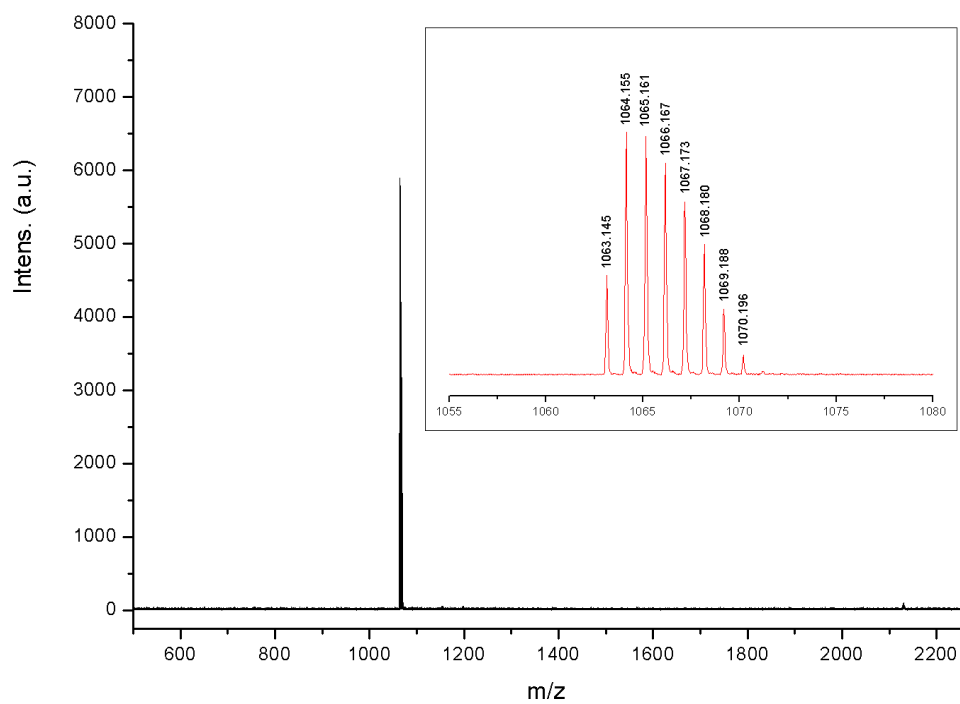Figure S24. MALDI-TOF spectrum of **9b**.

**Fluorescence Lifetime Decay****Compound 8a**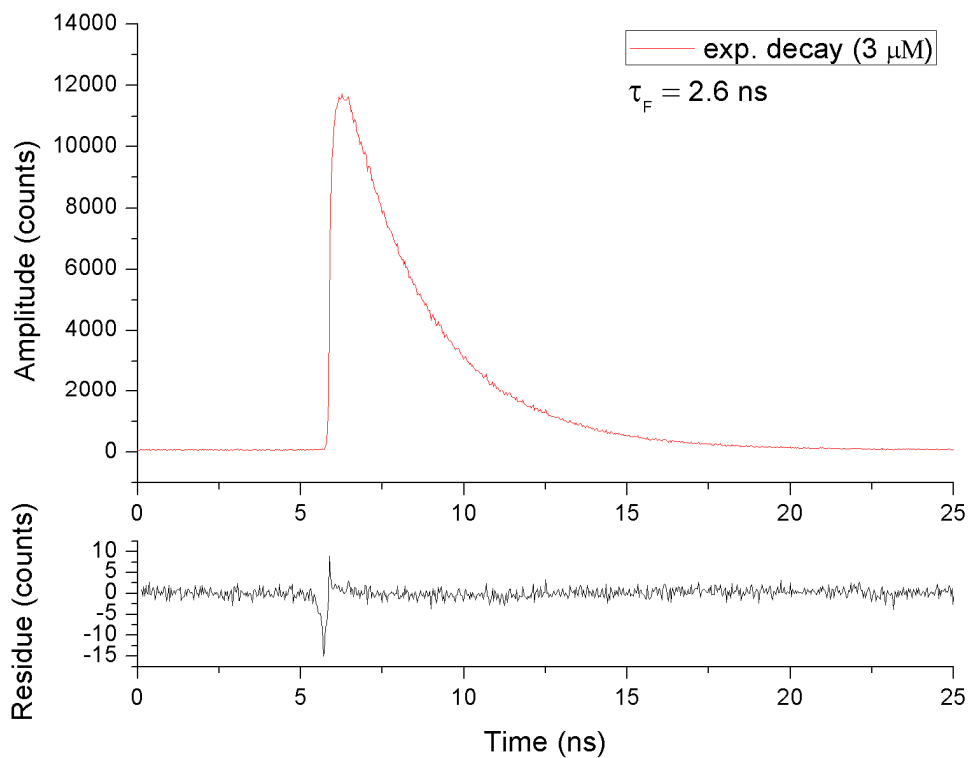**Figure S25.** Fluorescence Lifetime Decay of **8a**.**Compound 8b**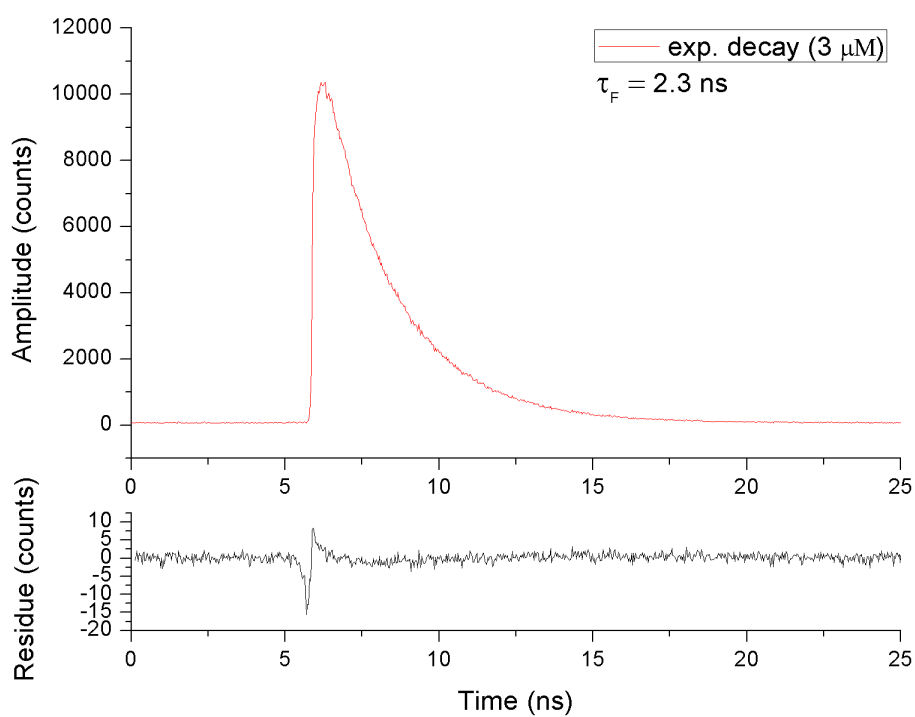**Figure S26.** Fluorescence Lifetime Decay of **8b**.

Compound **9a**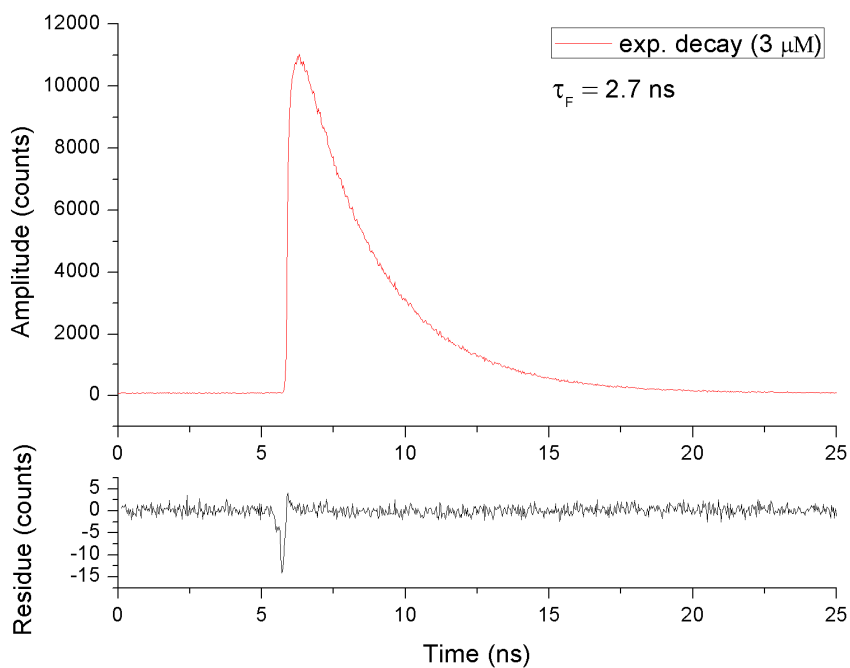**Figure S27.** Fluorescence Lifetime Decay of **9a**.Compound **9b**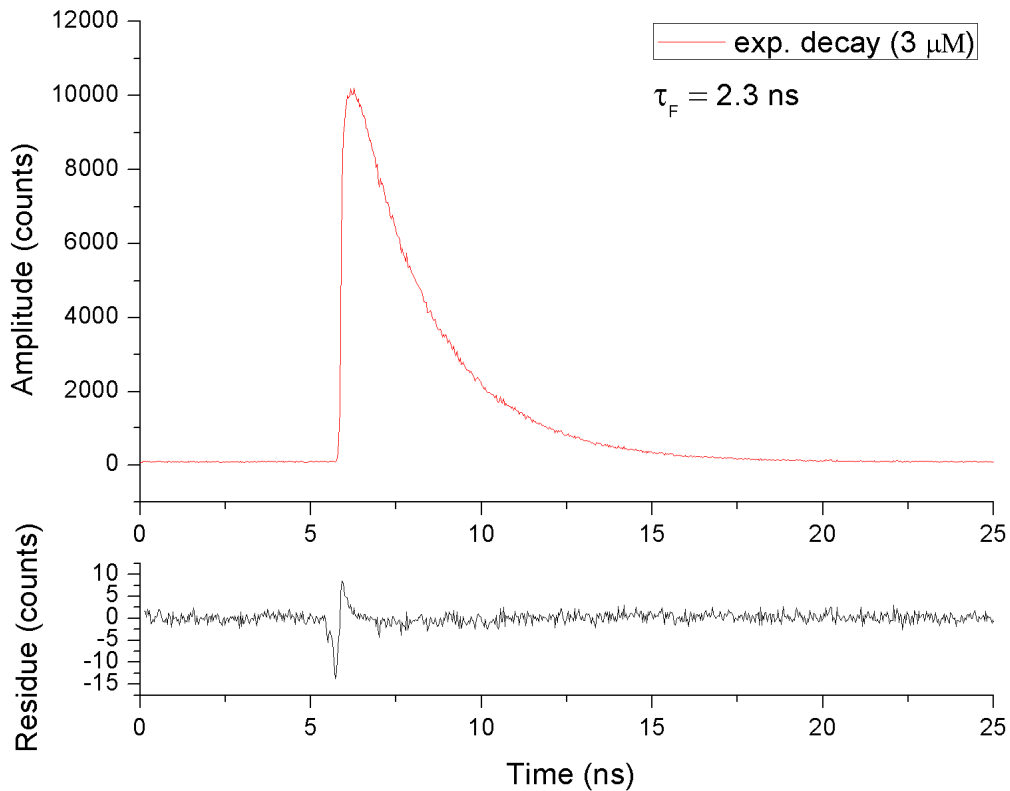**Figure S28.** Fluorescence Lifetime Decay of **9b**.

## UV-Vis spectra

Compound **8a**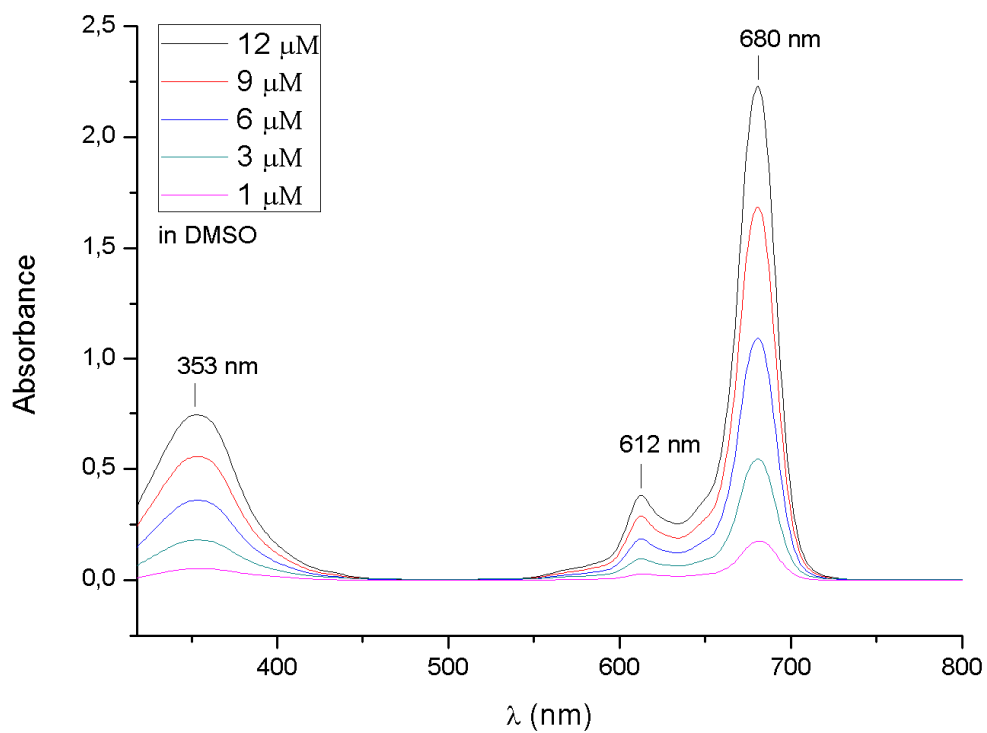Figure S29. UV-Vis spectrum of **8a**.Compound **8b**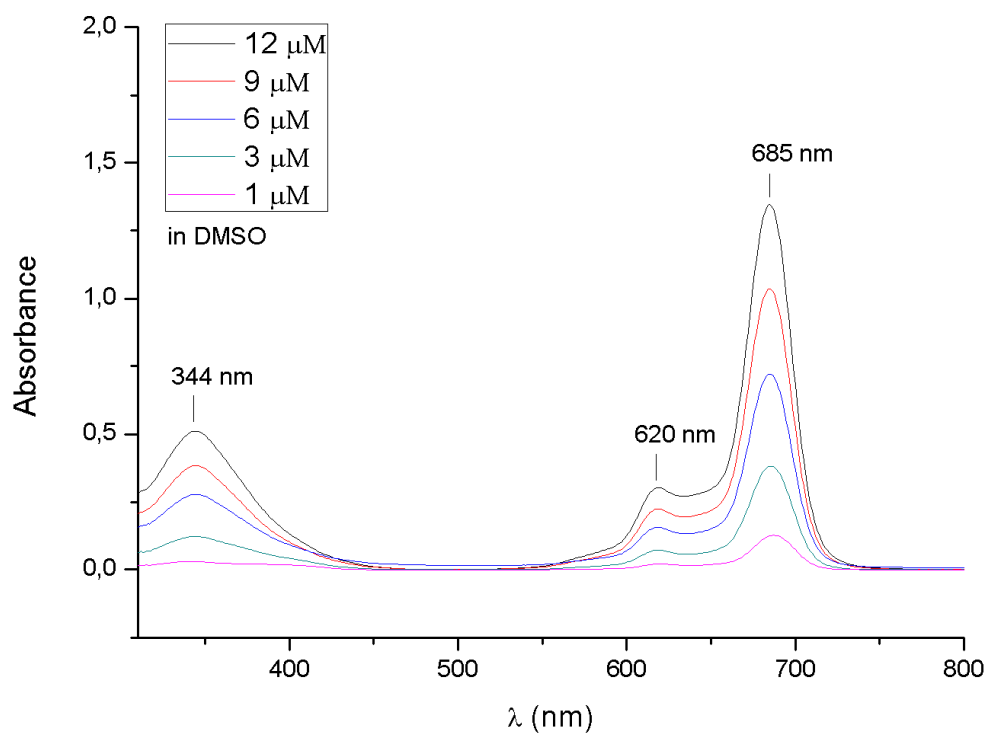Figure S30. UV-Vis spectrum of **8b**.

Compound **9a**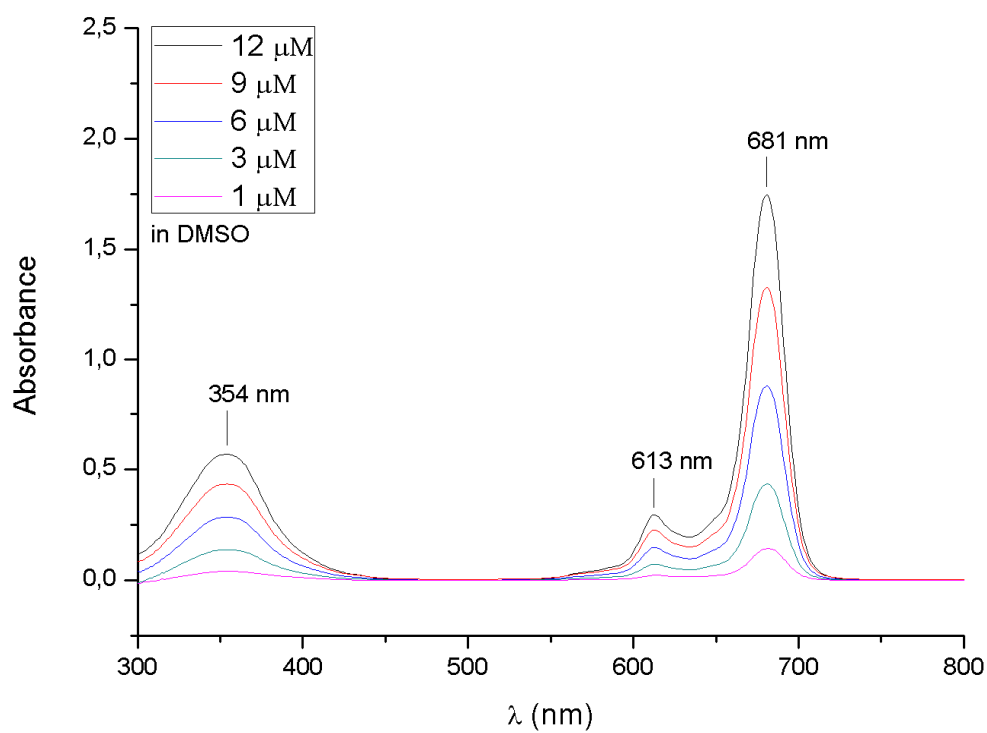**Figure S31.** UV-Vis spectrum of **9a** in DMSO.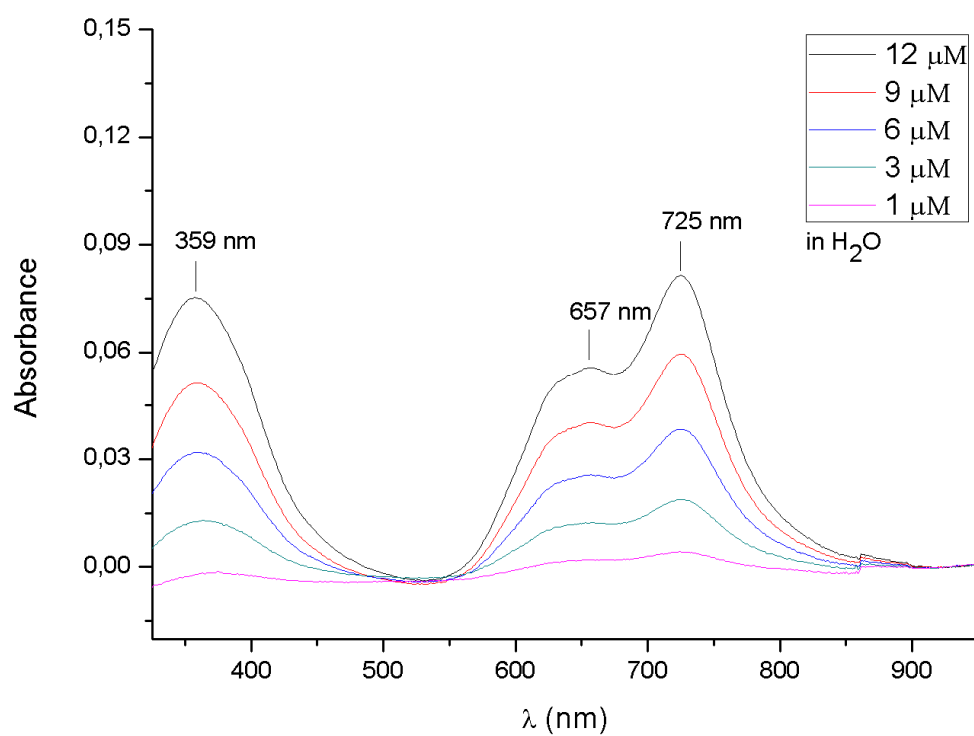**Figure S32.** UV-Vis spectrum of **9a** in  $\text{H}_2\text{O}$ .



Compound **9b**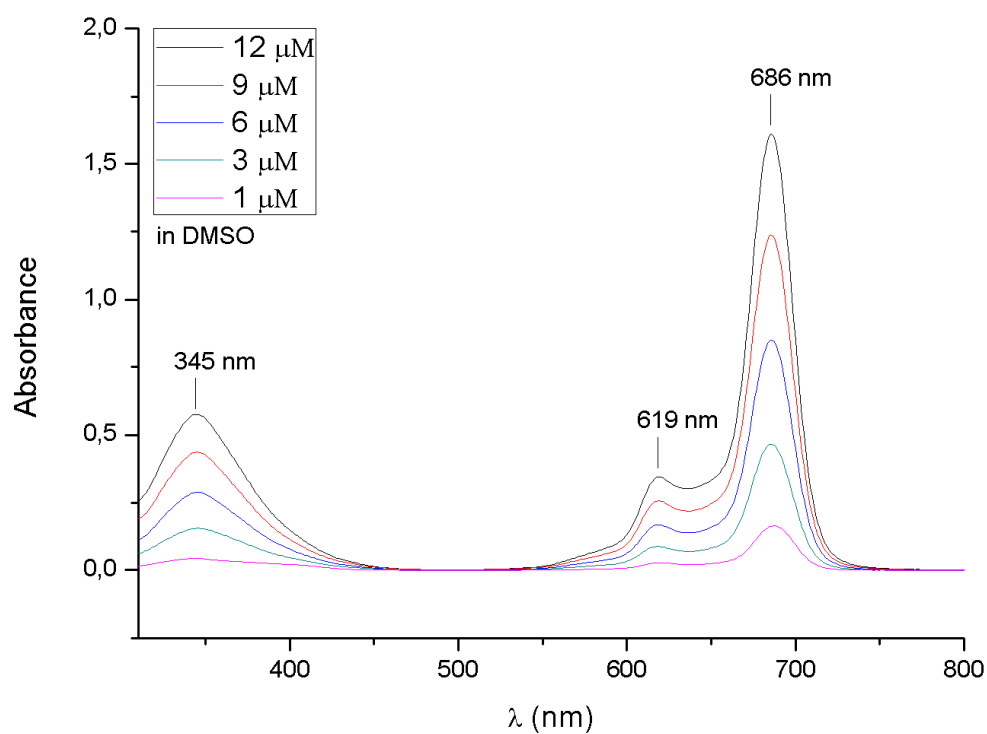**Figure S33.** UV-Vis spectrum of **9b** in DMSO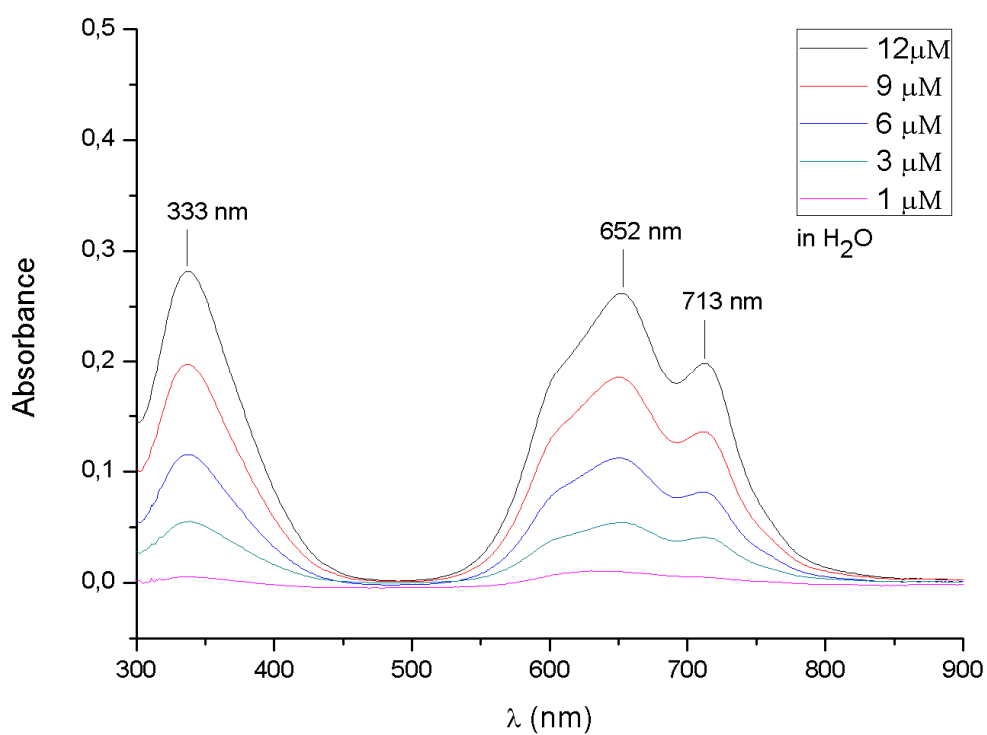**Figure S34.** UV-Vis spectrum of **9b** in  $\text{H}_2\text{O}$ .
